# Supplementary material for: Insight into the Role and Regulation of Gap Junction Genes in Lung Cancer and Identification of Nuclear Cx43 as a Putative Biomarker of Poor Prognosis
Source: Preprints.org preprint supplement (doi:10.20944/preprints201902.0109.v1), 2019-02-13

### Supplementary File 1.

**Connexin mRNA expression in healthy lung tissue (blue) and corresponding lung tumour subtypes LUAD and LUSC (red).** The figure corresponds to Table 1 (and are grouped into (a) increased, (b) decreased or (c) mixed changes in connexin expression in LUSC and LUAD compared to healthy tissue).

#### A) Increased expression in LUAD and LUSC tumours:

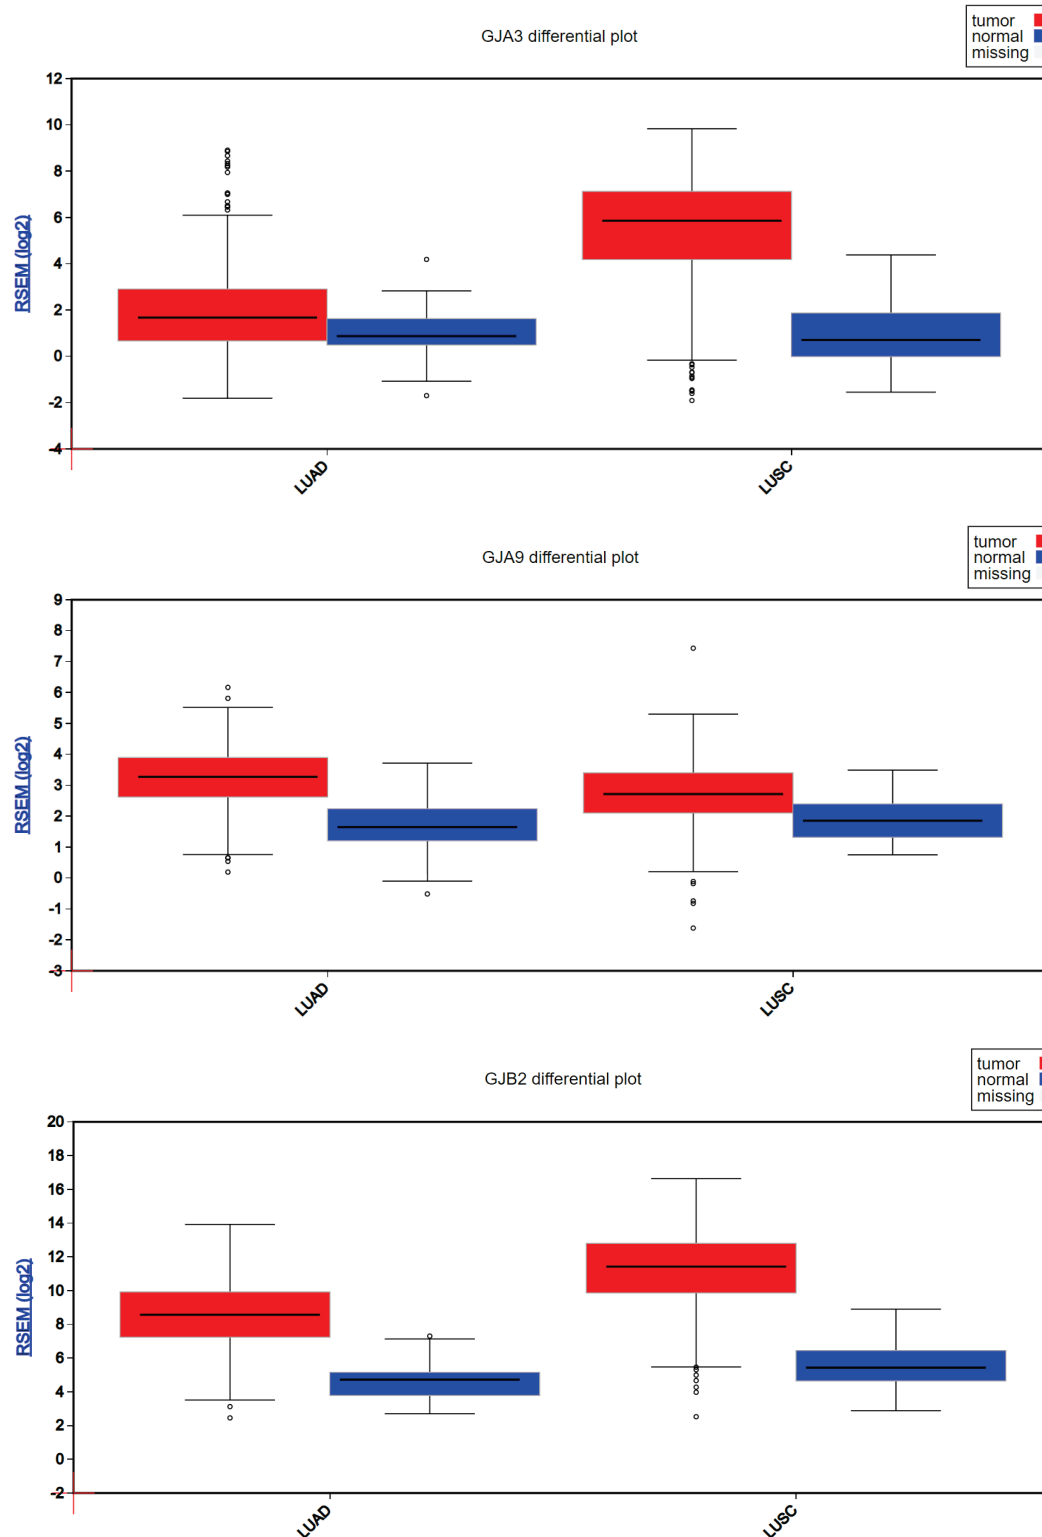

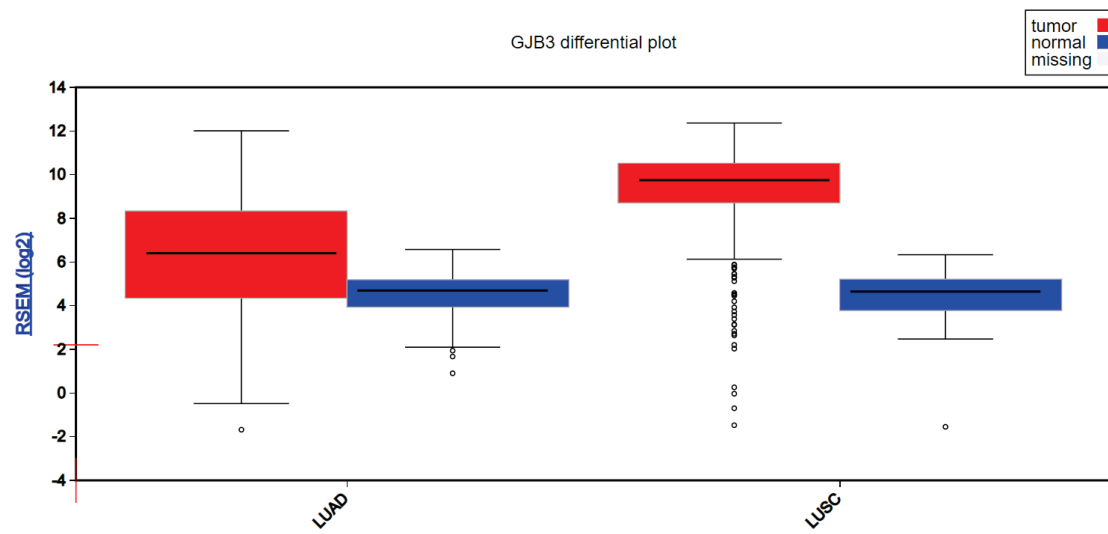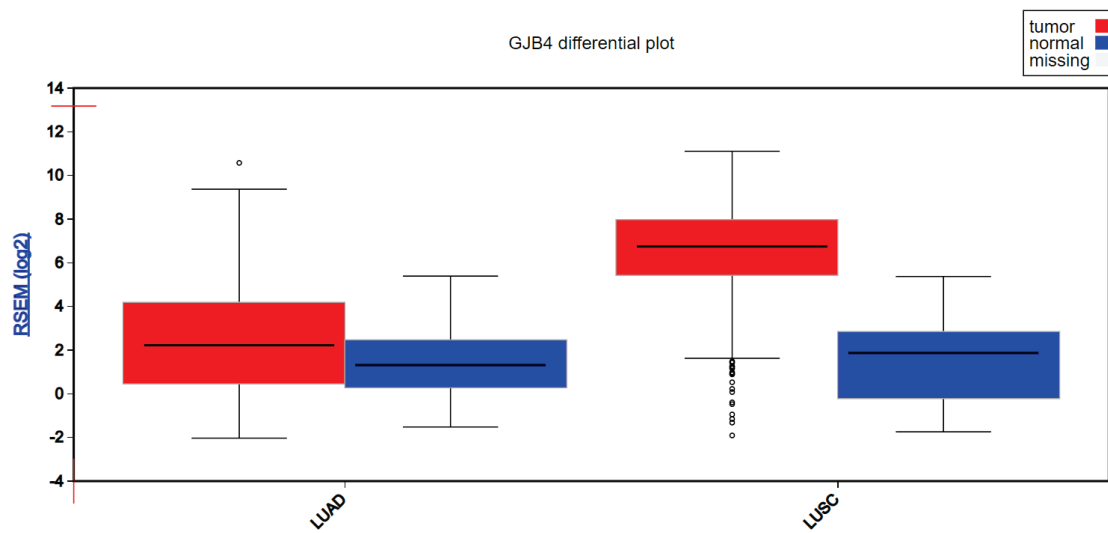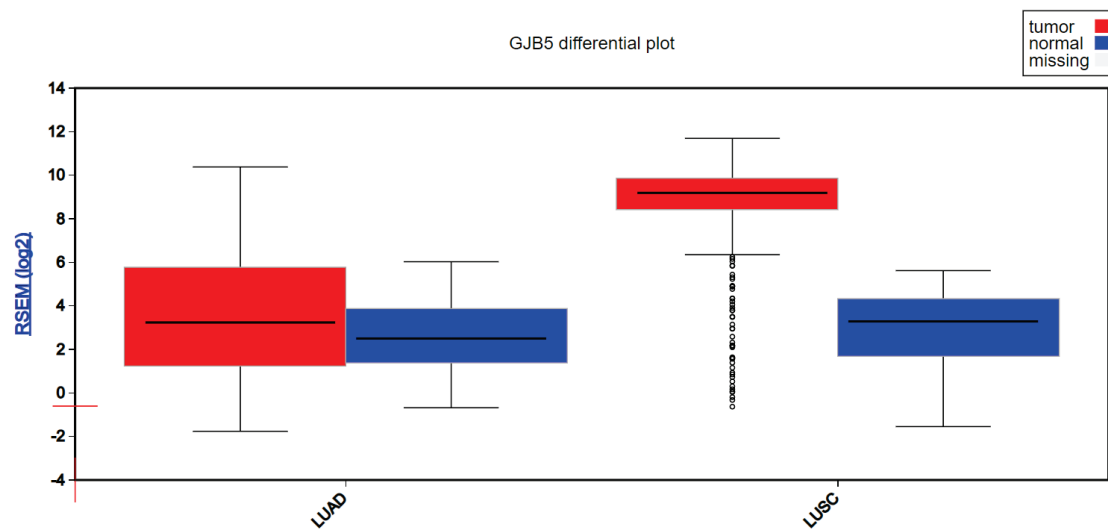

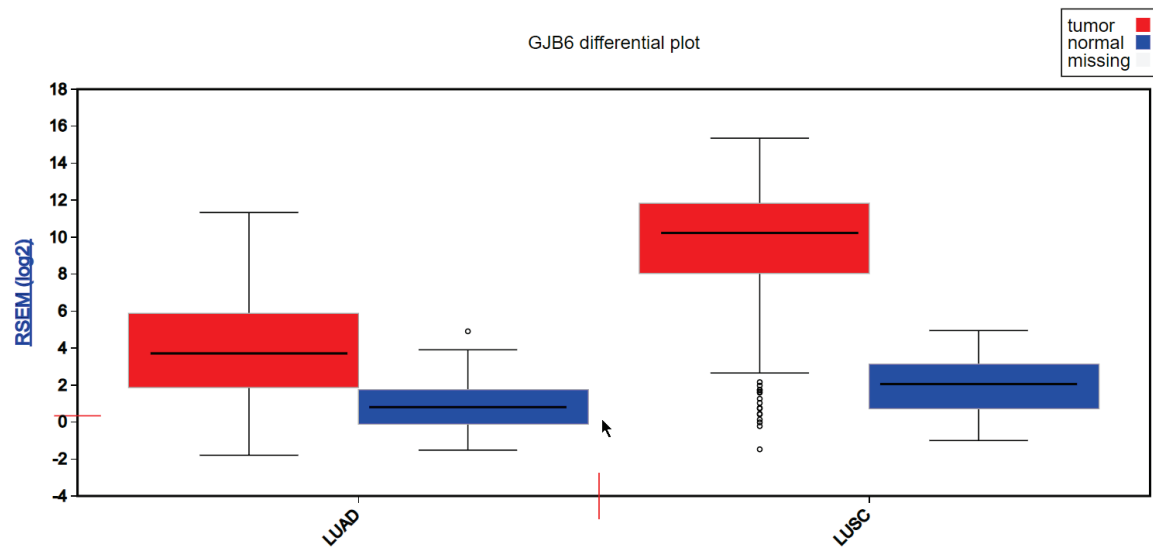

**B) Decreased expression in both LUAD and LUSC tumours:**

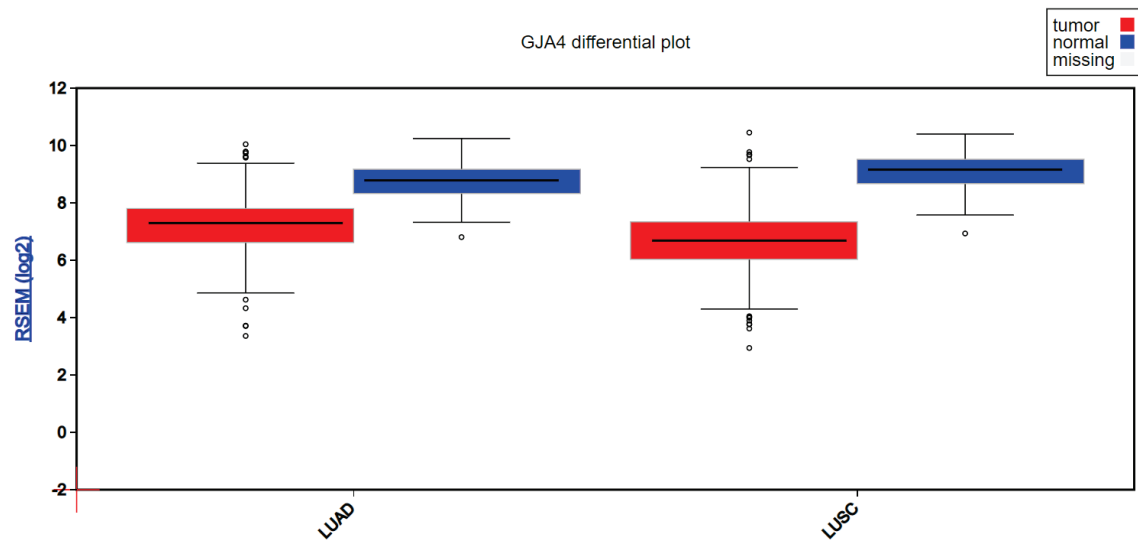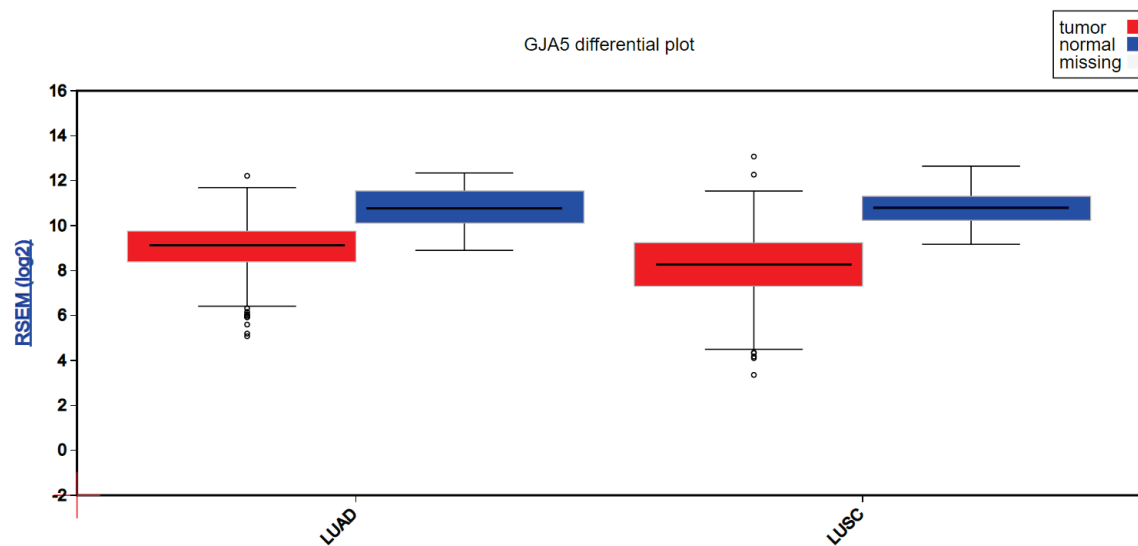

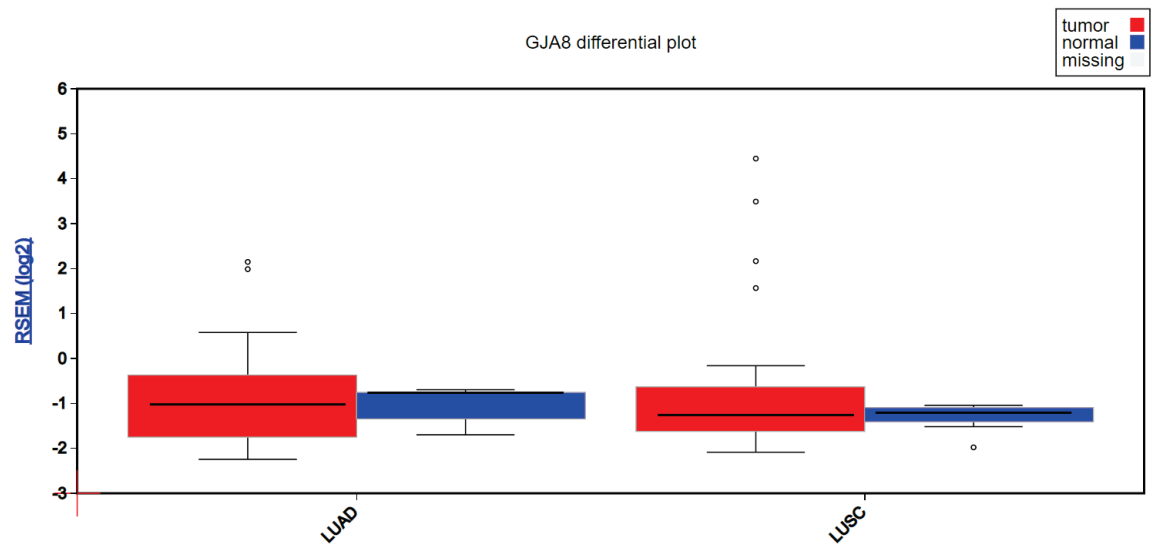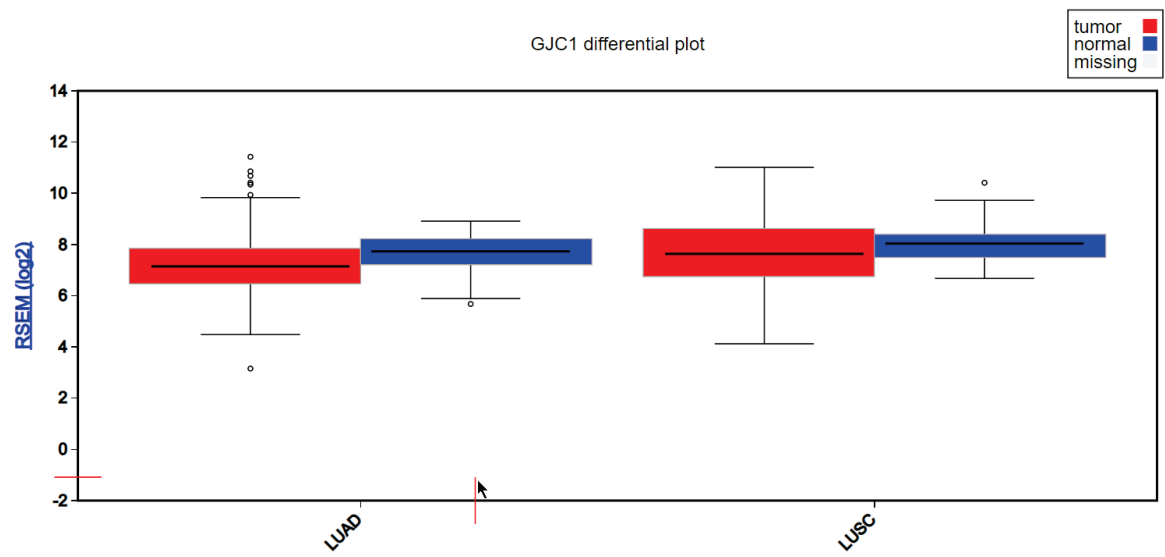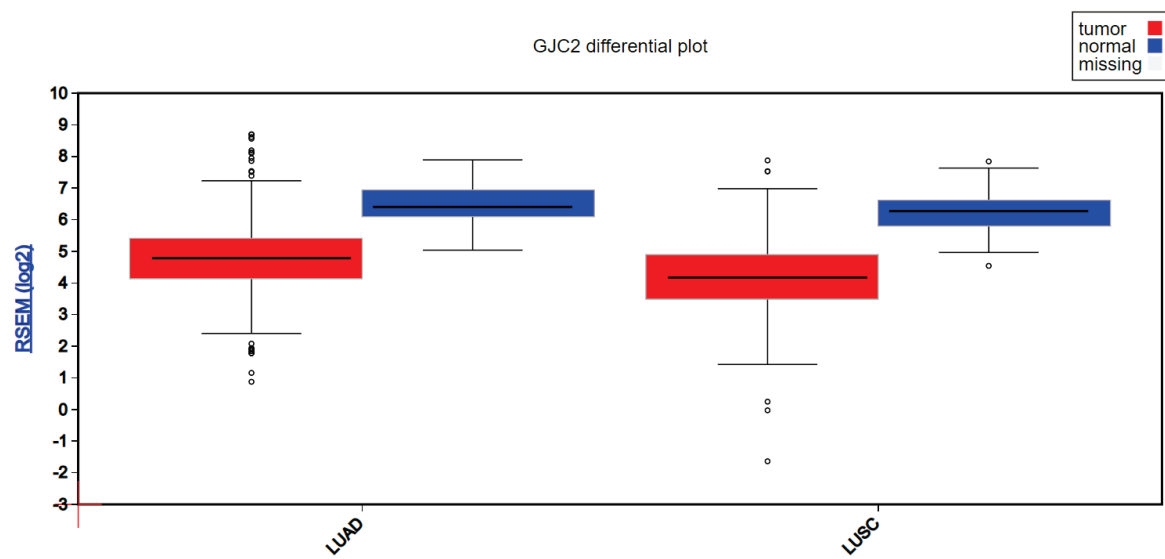

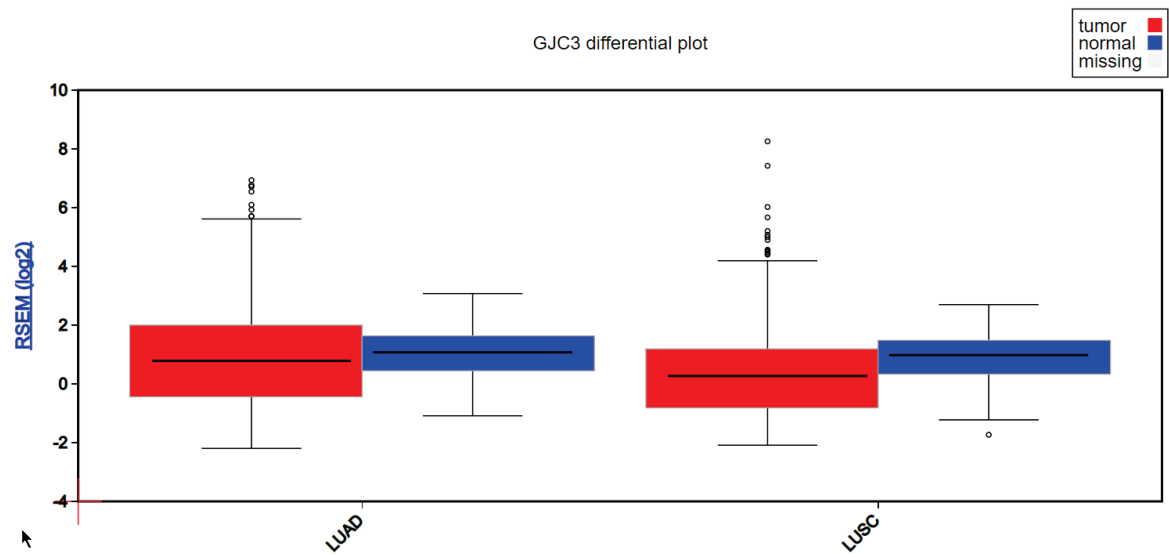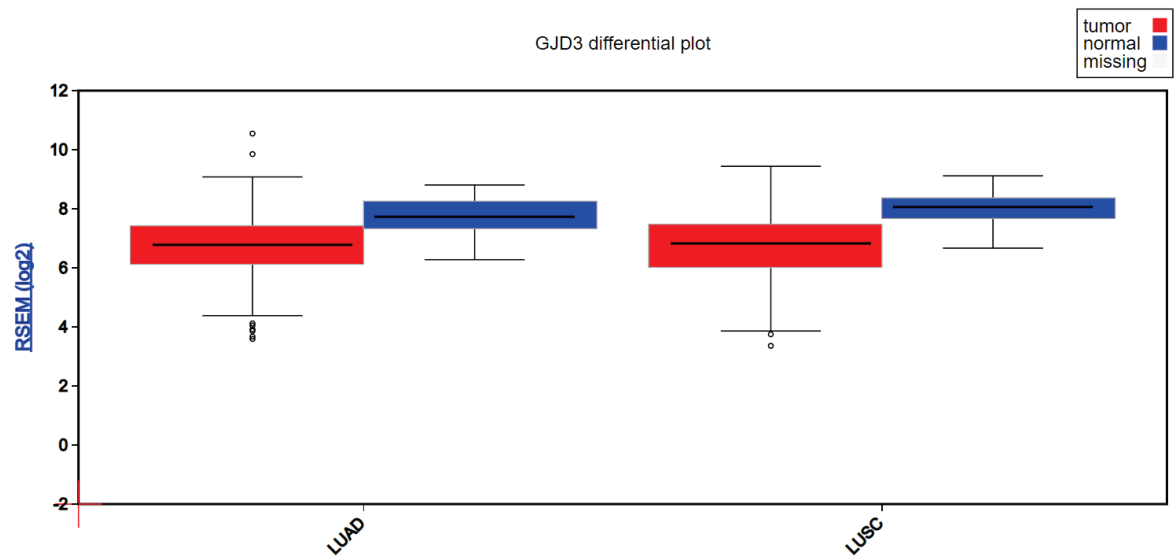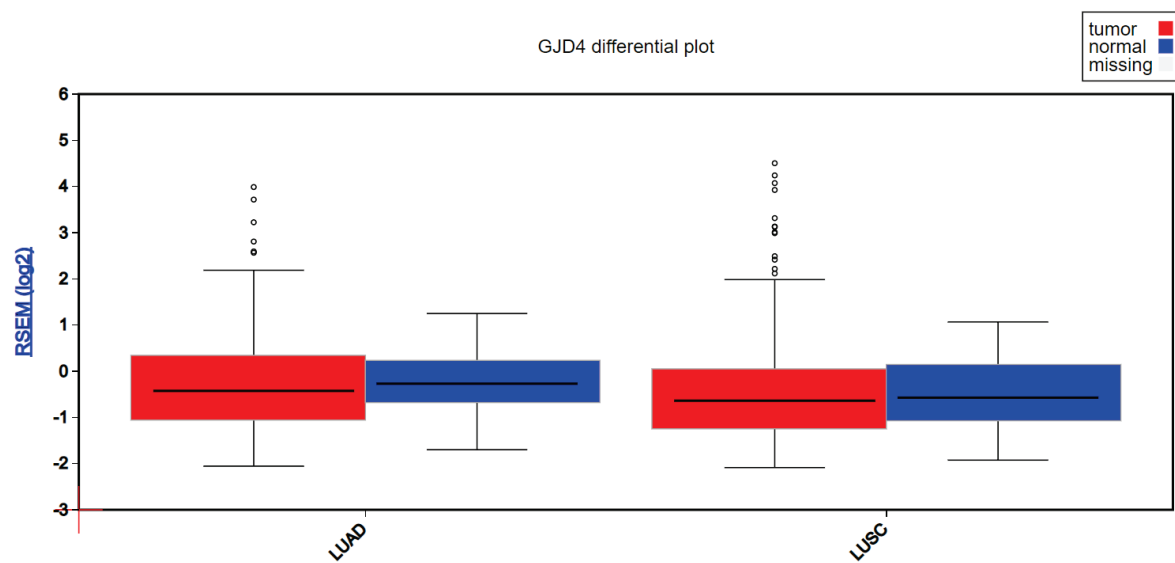

**C) Mixed, increased and decreased expression in LUAD versus LUSC tumours:**

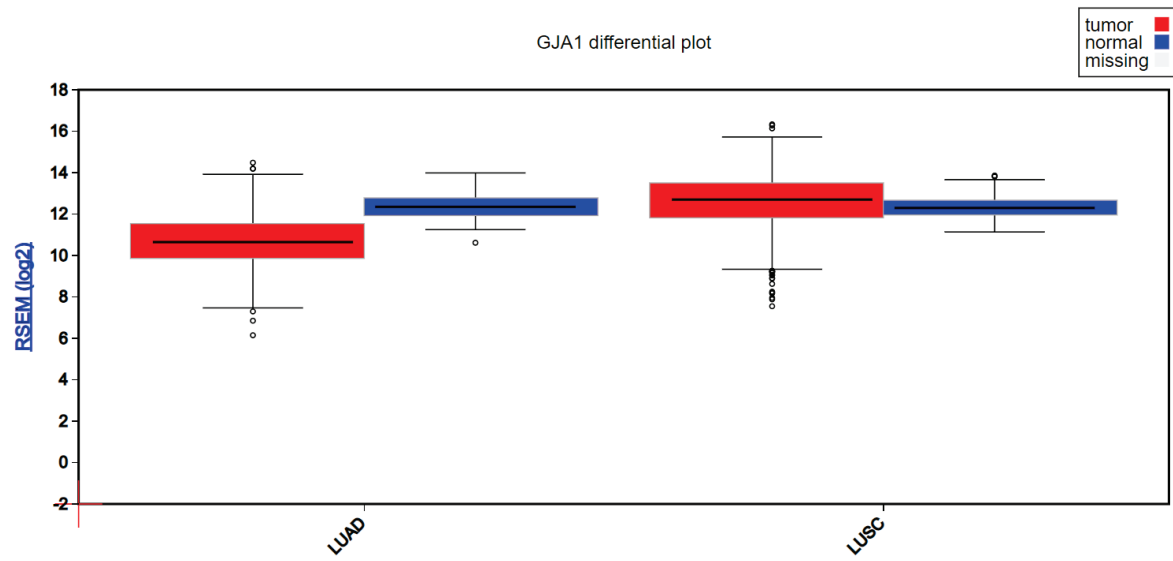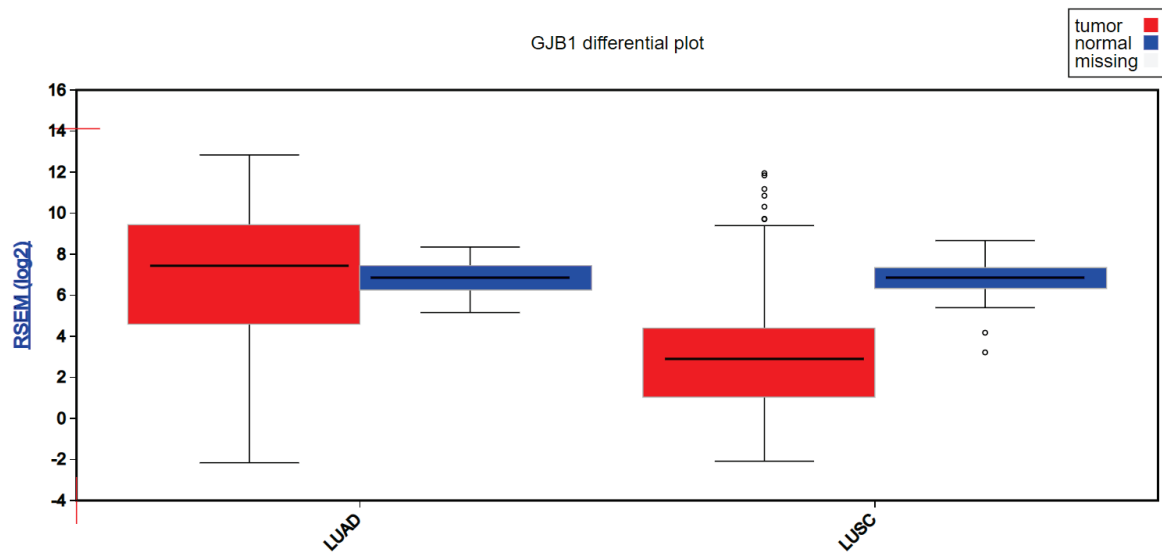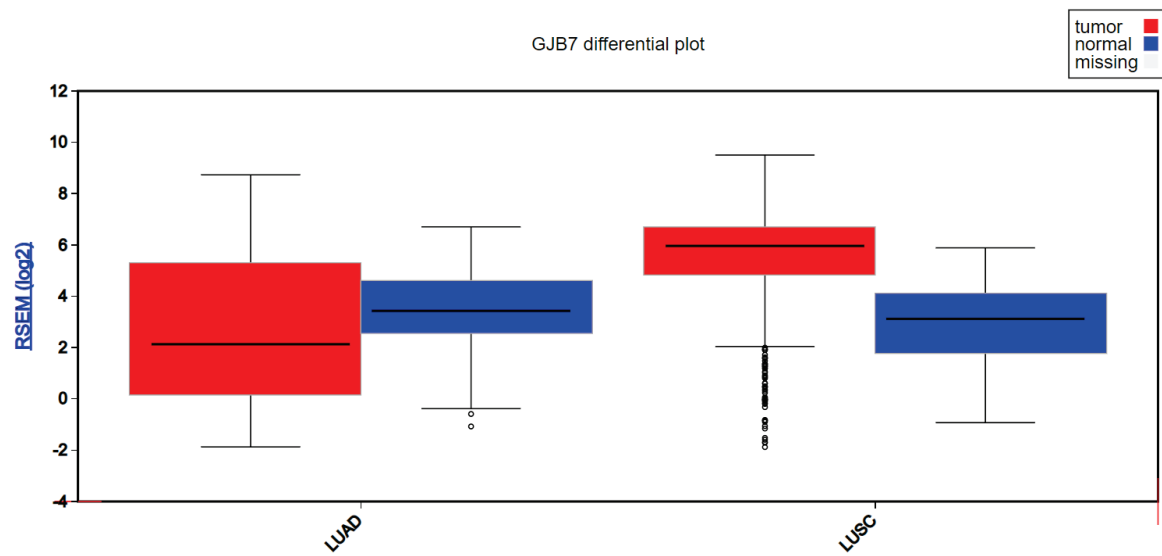

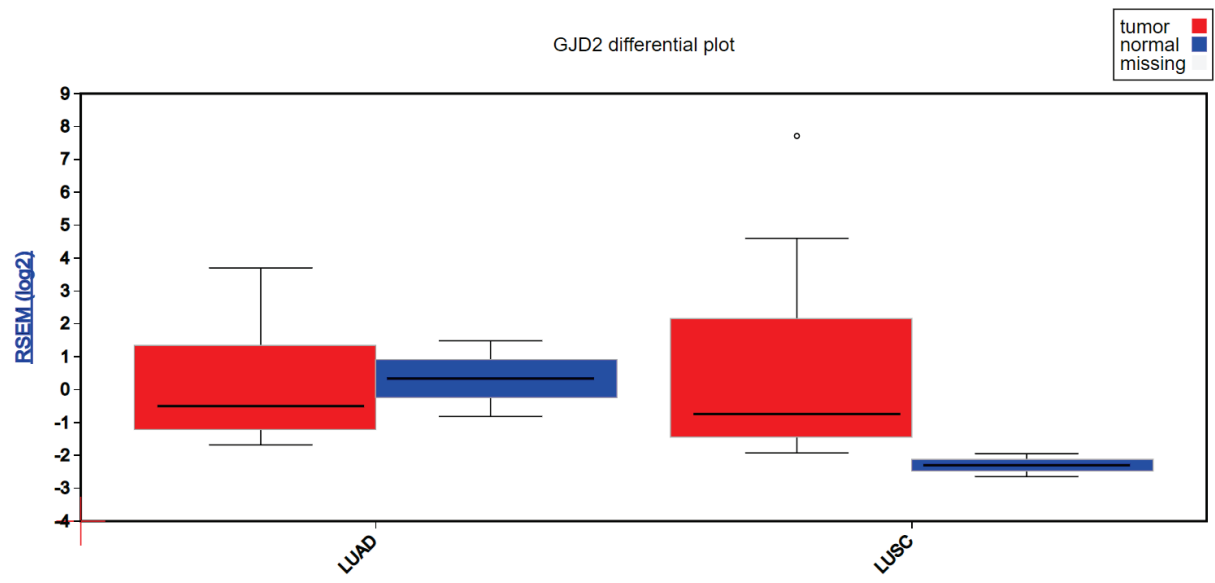

Supplement: Supplementary file 4 [file supplementary]
