# Supplementary material for: Insight into the Role and Regulation of Gap Junction Genes in Lung Cancer and Identification of Nuclear Cx43 as a Putative Biomarker of Poor Prognosis
Source: Preprints.org preprint supplement (doi:10.20944/preprints201902.0109.v1), 2019-02-13

### Supplementary Figure 3.

**Kaplan-Meier curves of connexins known to drive lung tumorigenesis.** The cohort expressing high levels of connexin mRNA is depicted in red, and the cohort with low connexin levels is in black. Probability refers to the likelihood of being alive at any time point. A hazard ratio (HR) below 1 suggests an association with better prognosis, whereas a HR above 1 suggests better prognosis (in the cohort expressing high levels of connexins).

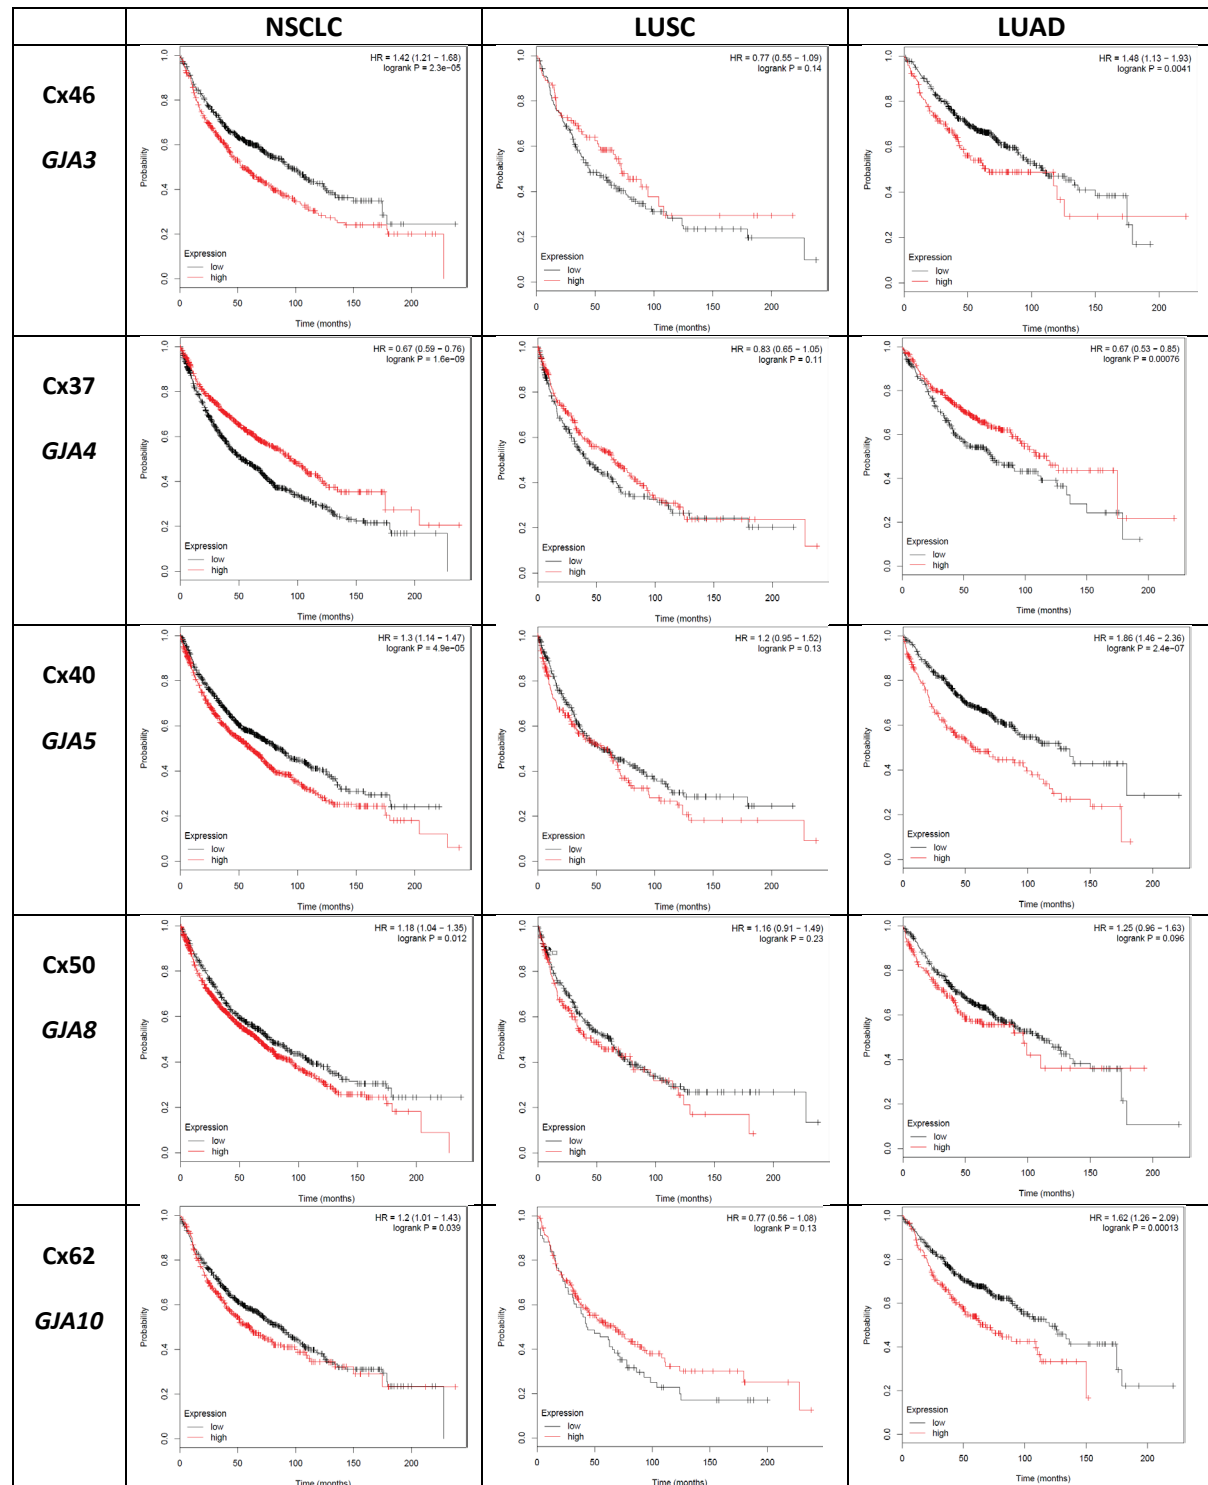

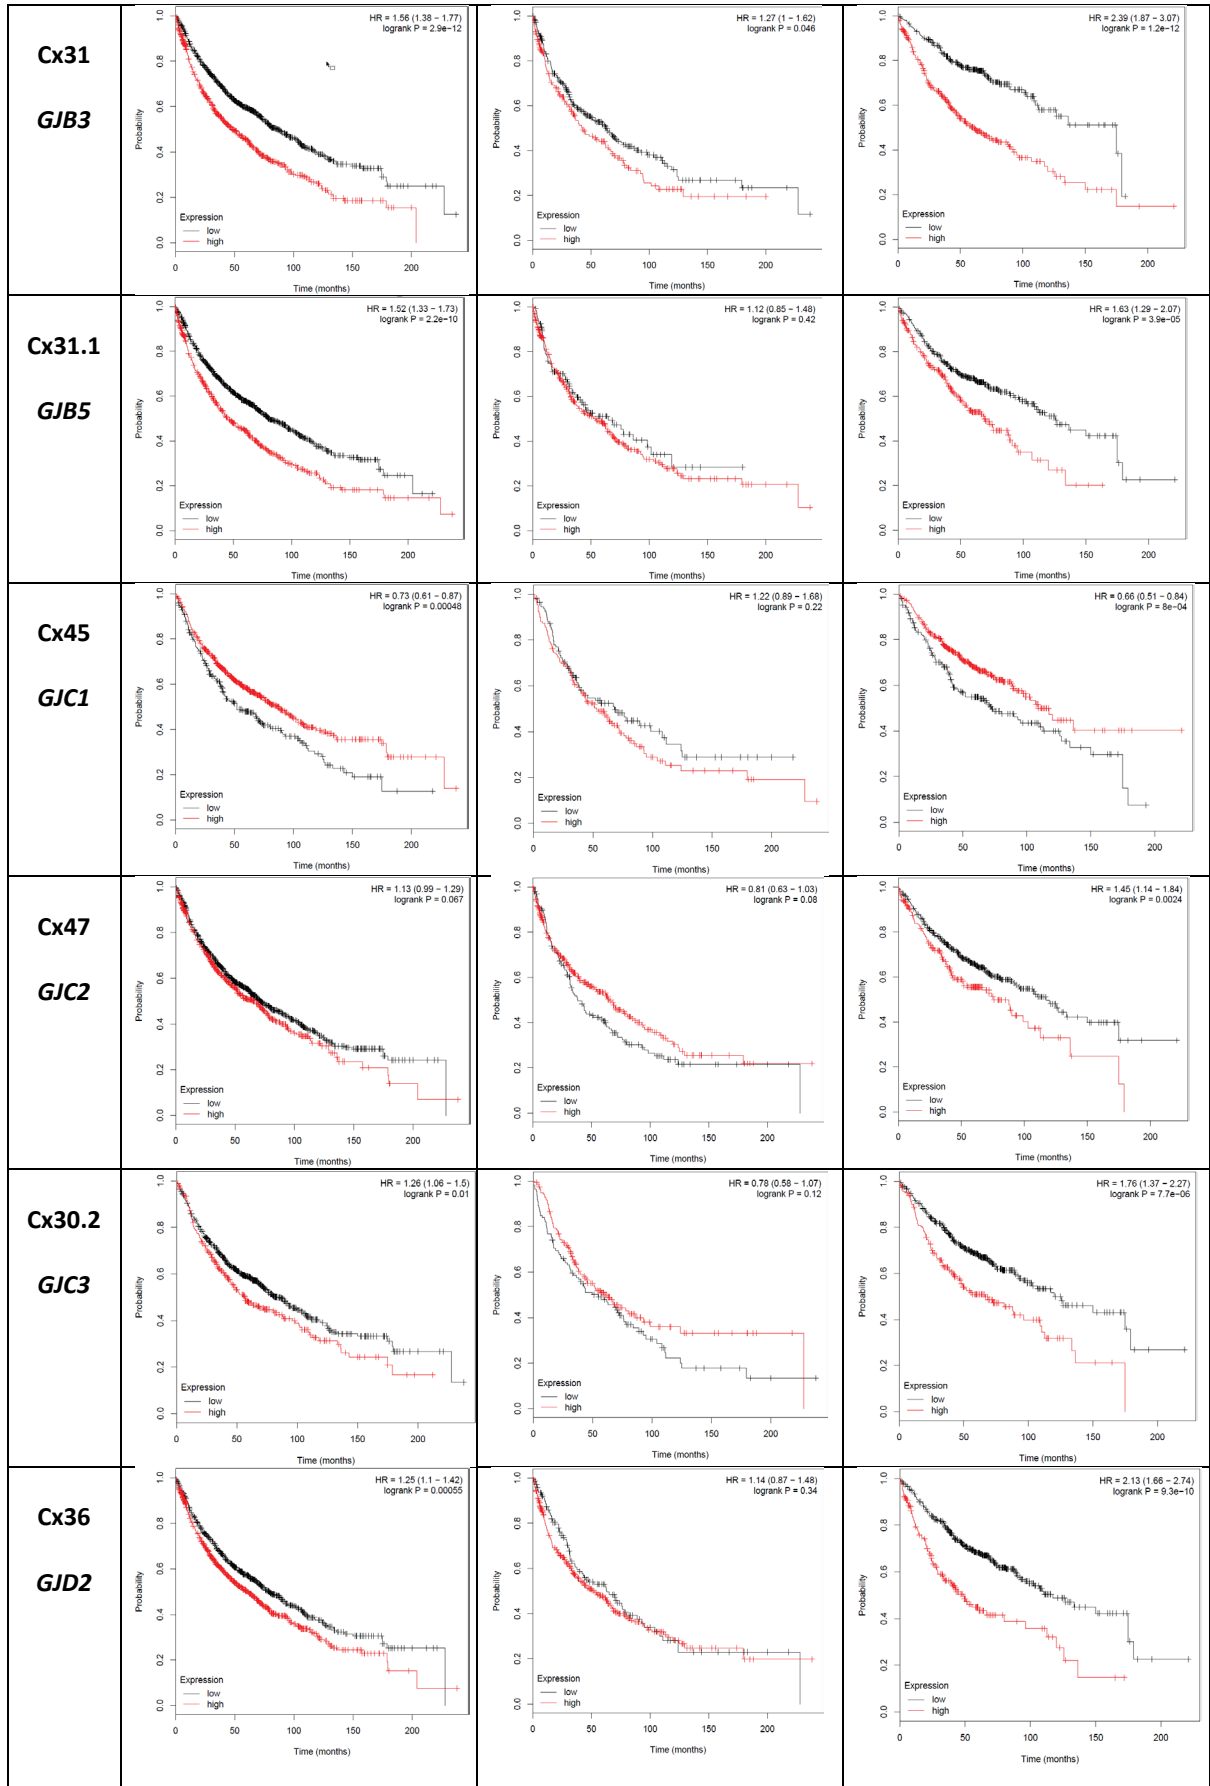

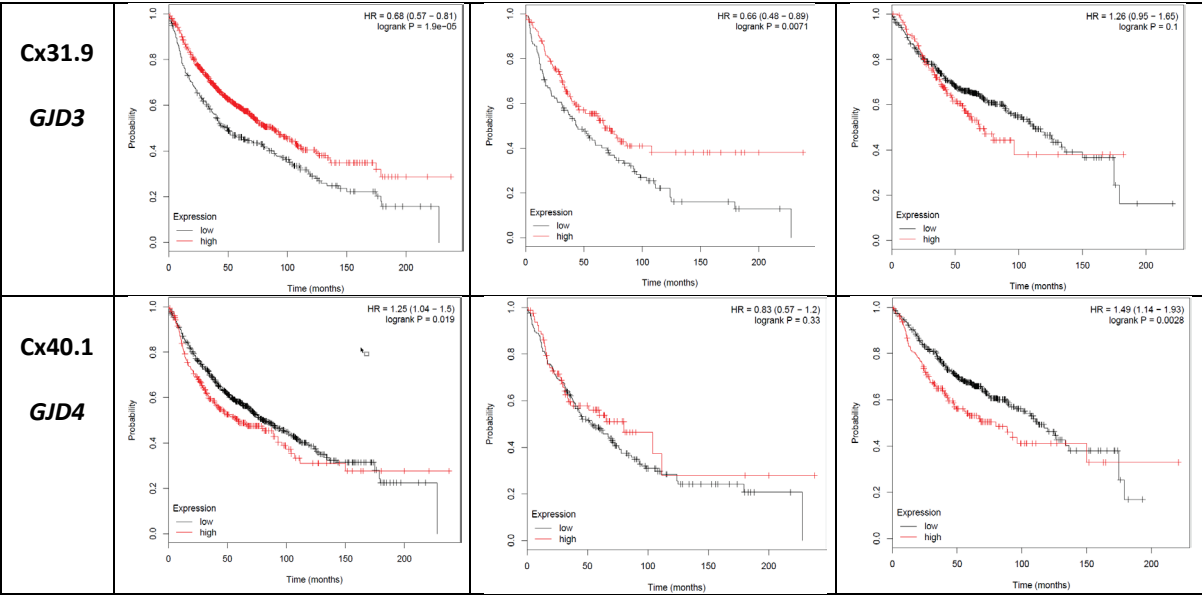

Supplement: Supplementary file 1 [file supplementary]
