# Supplementary material for: Insight into the Role and Regulation of Gap Junction Genes in Lung Cancer and Identification of Nuclear Cx43 as a Putative Biomarker of Poor Prognosis
Source: Preprints.org preprint supplement (doi:10.20944/preprints201902.0109.v1), 2019-02-13

## Supplementary File 2.

**Examples of methylation statuses of key connexin genes in healthy versus tumour tissue.** A 450k Methylation Array displaying individual probes along the gene region is shown (equally distributed). Probes in green are part of the CpG cluster of this gene. Significant differences are highlighted with an asterisk on individual probes. These examples illustrate poor correlation for the four connexin genes in focus of this study (GJB1, GJB6, GJB2 and GJA1, all showing moderate or poor correlation) as well as GJB5 which is included as an example of a connexin gene which correlate moderately well between changes in methylation status and mRNA expression. See Figure 3 for a more detailed example of GJB2.

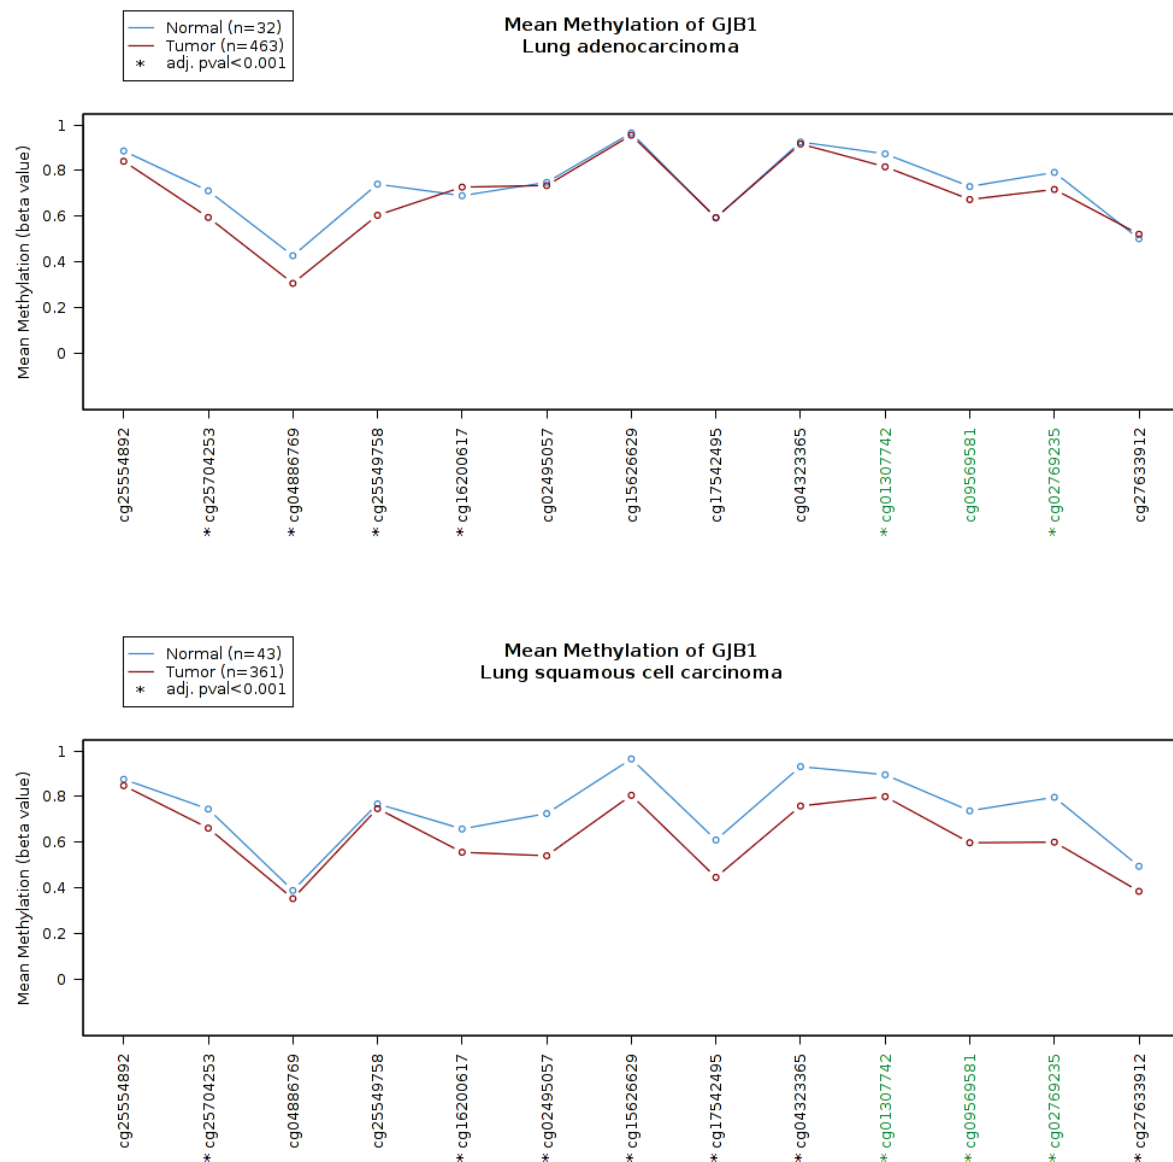

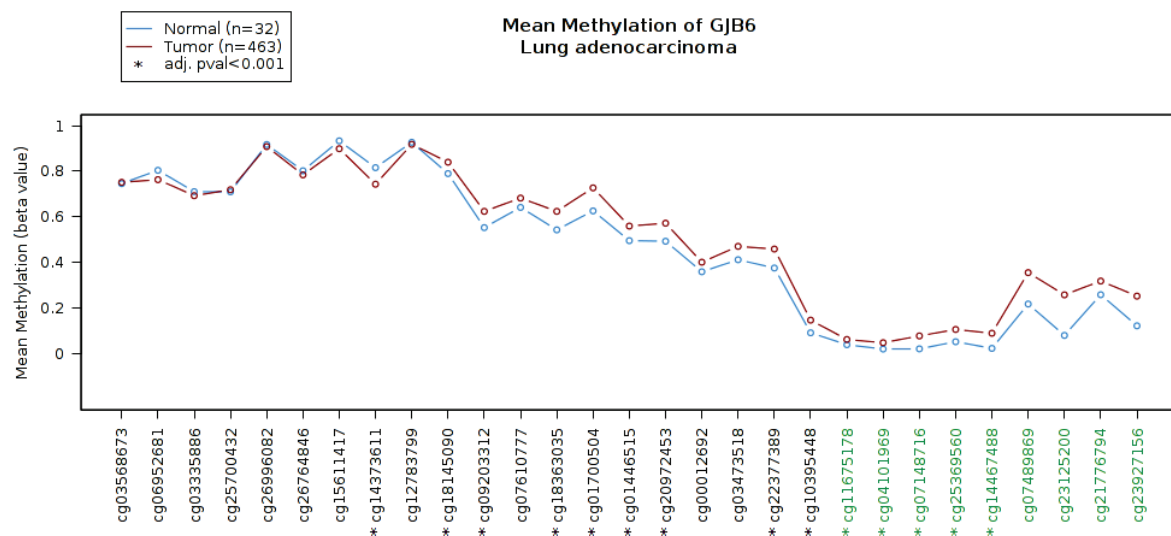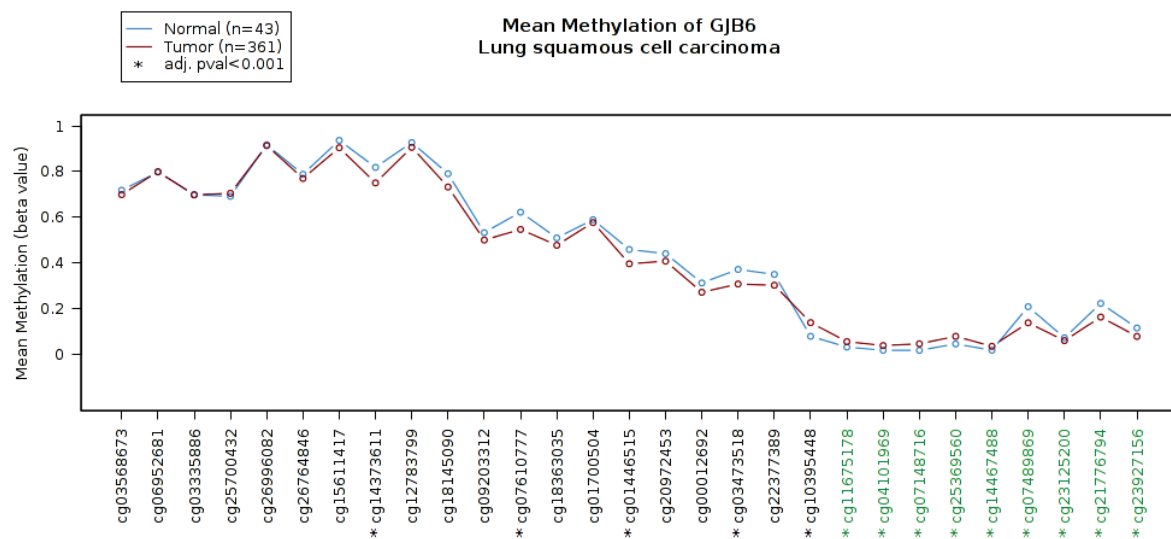

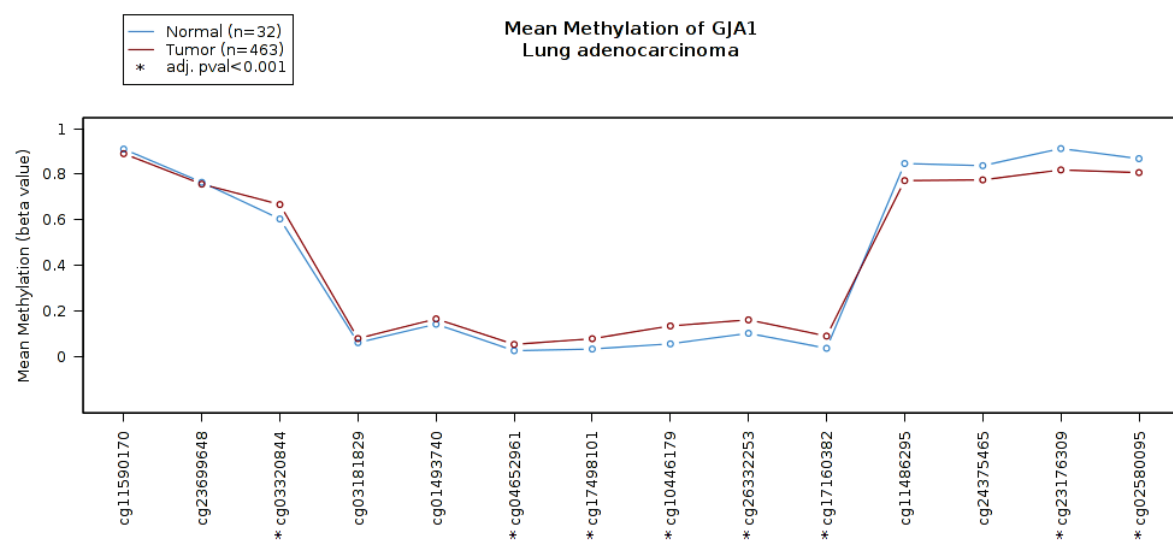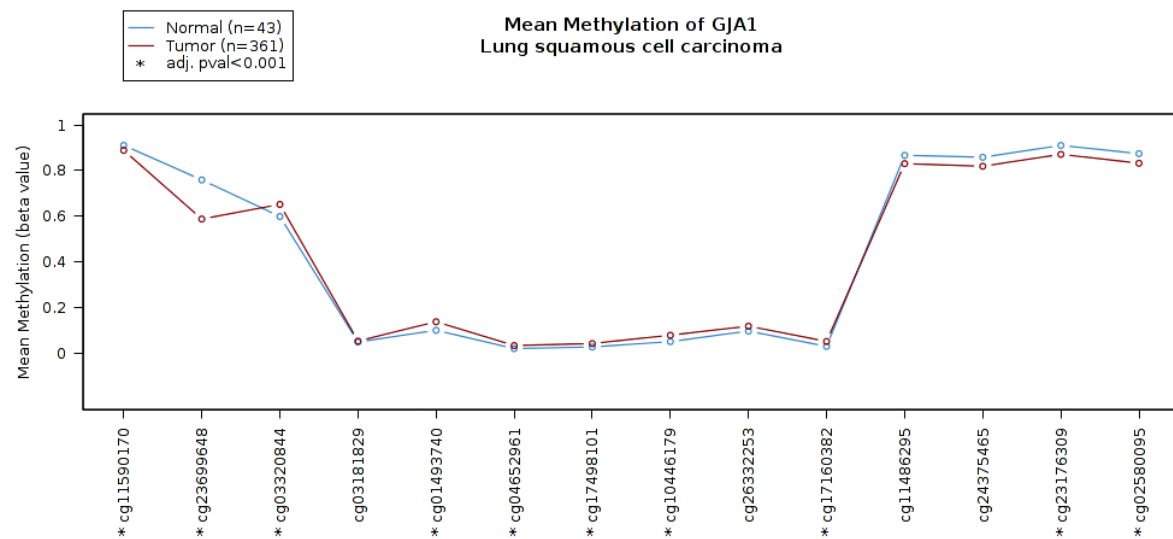

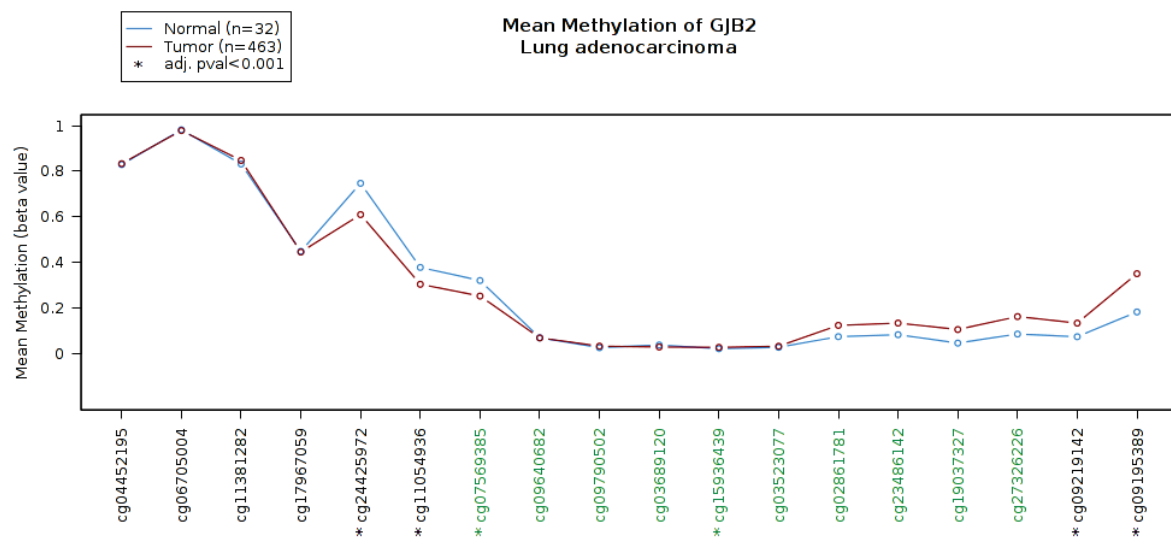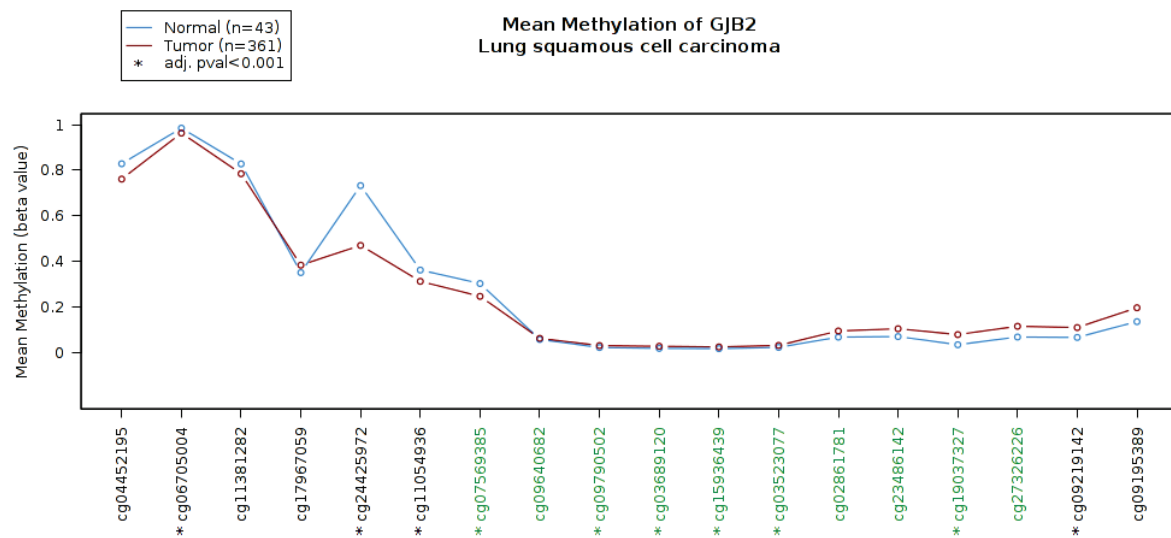

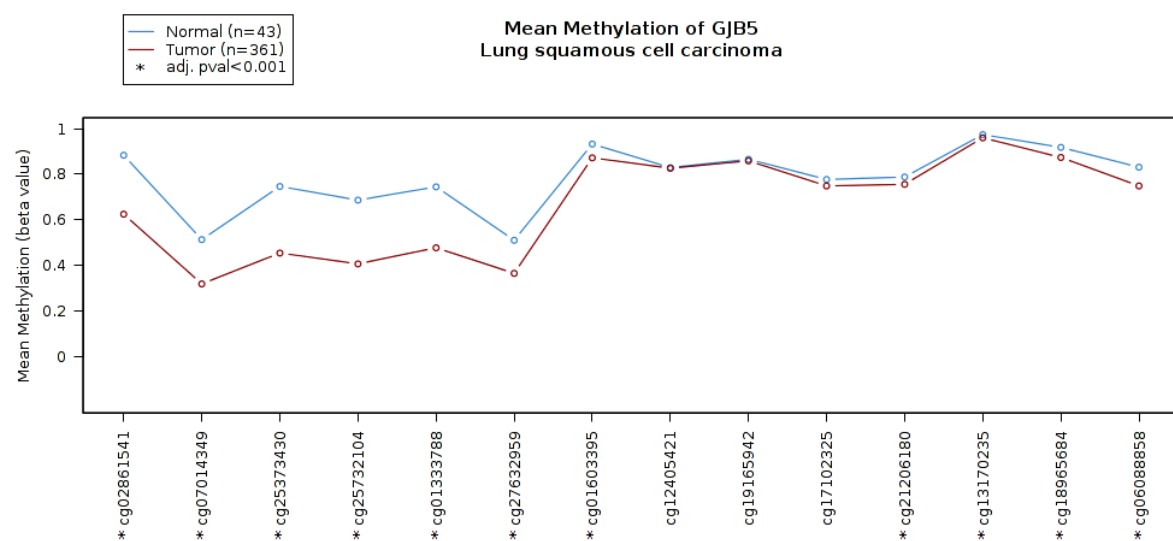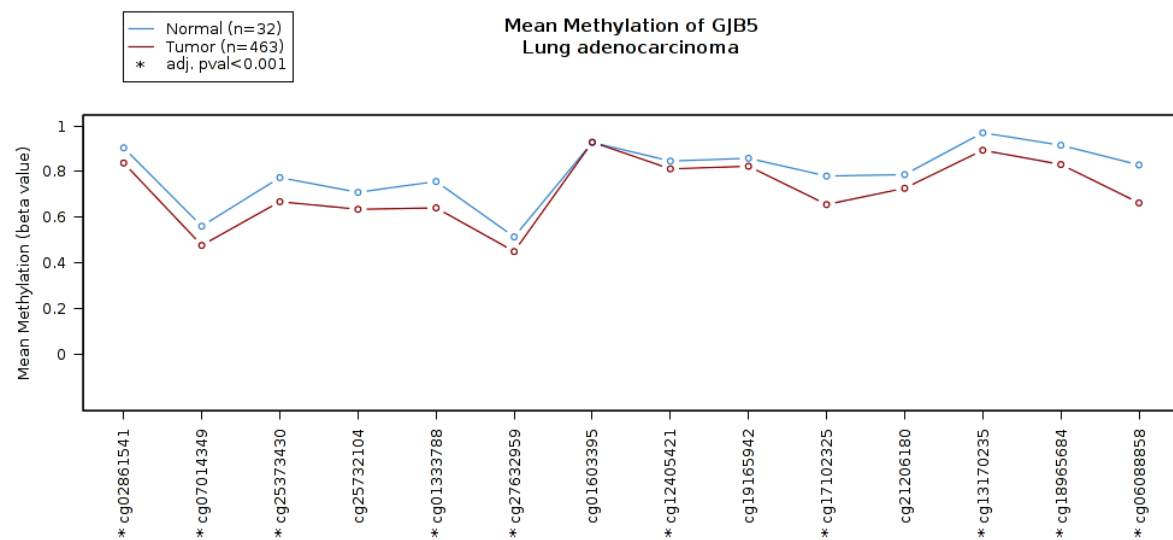

Supplement: Supplementary file 2 [file supplementary]
