# Supplementary material for: Insight into the Role and Regulation of Gap Junction Genes in Lung Cancer and Identification of Nuclear Cx43 as a Putative Biomarker of Poor Prognosis
Source: Preprints.org preprint supplement (doi:10.20944/preprints201902.0109.v1), 2019-02-13
Supplement: Supplementary file 3 [file supplementary]

## Supplementary File 6.

**Kaplan-Meier curves based on Cx43 expression patterns detected by immunohistochemistry of lung cancer samples.** Tumours with IHC deemed significant are depicted in red and compared with the rest of the tumour samples (in blue). P-values refer to the log-rank test (Mantel-Cox analysis). Average survival times of the patient cohorts are listed.

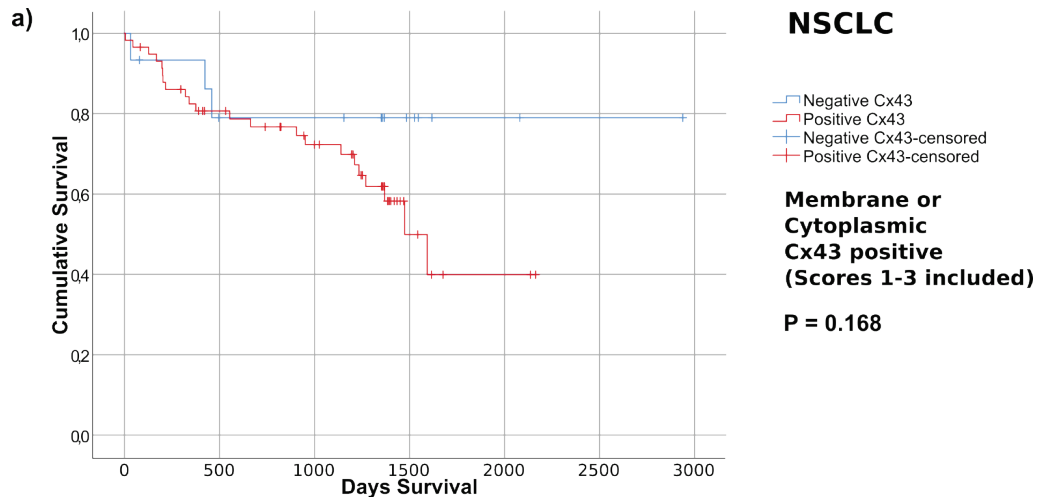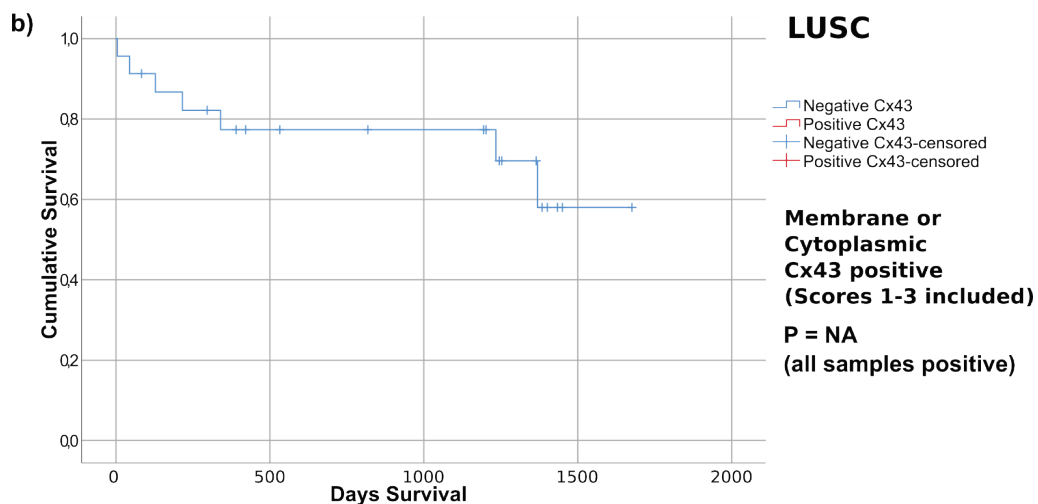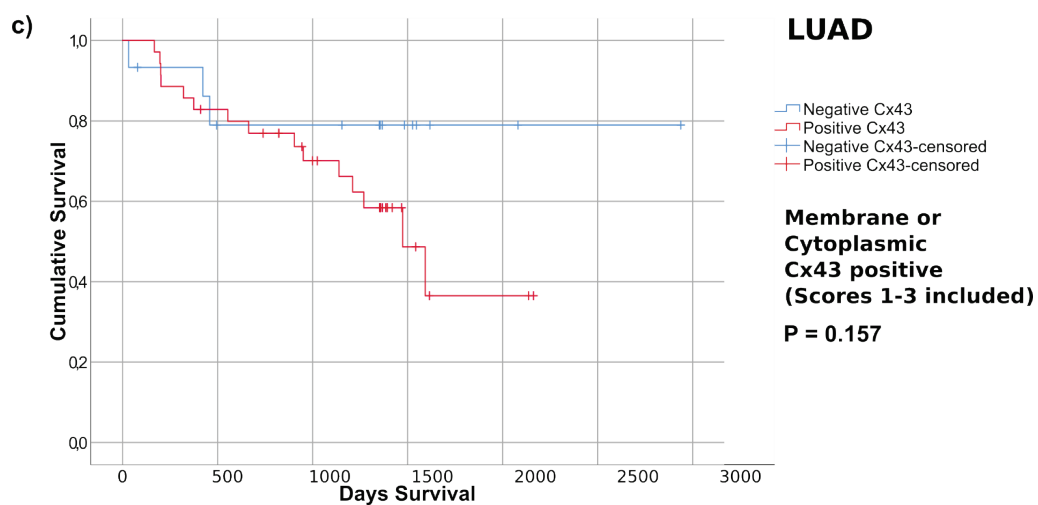

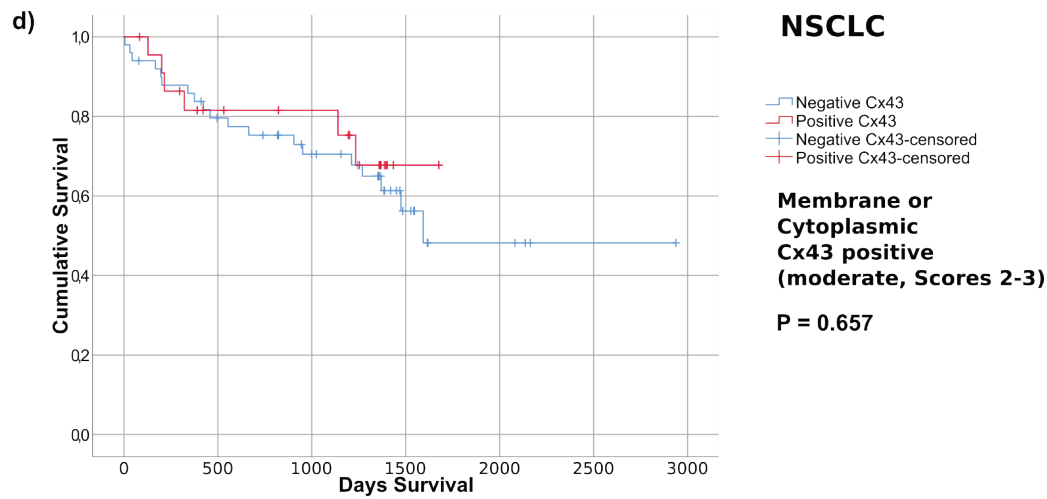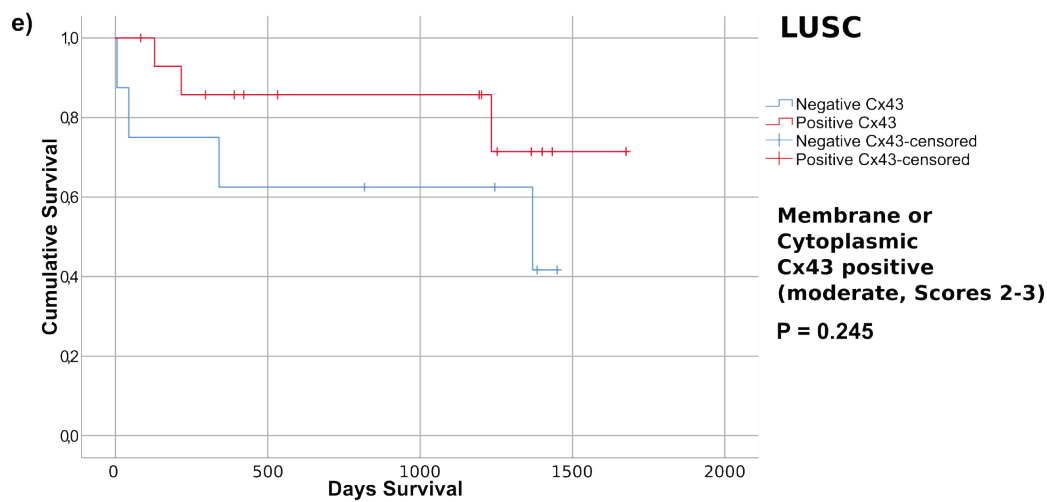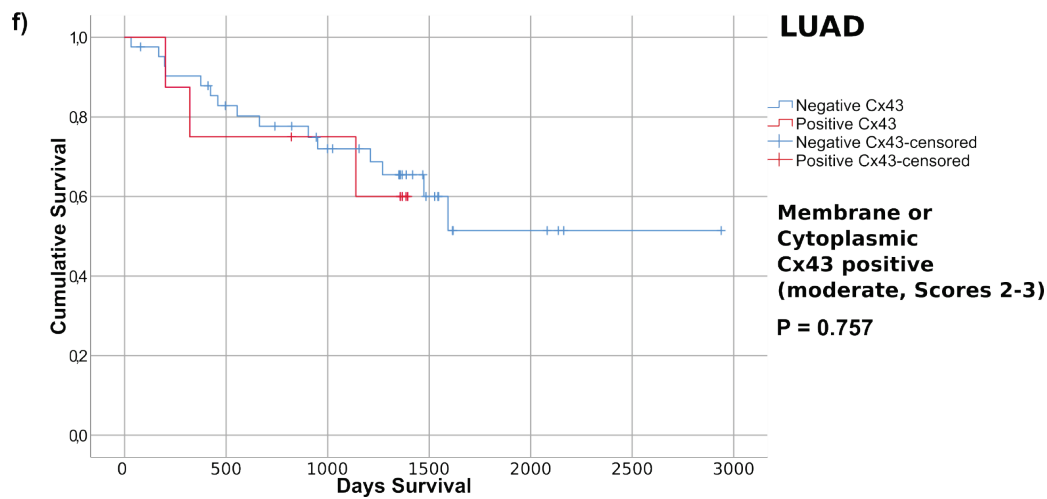

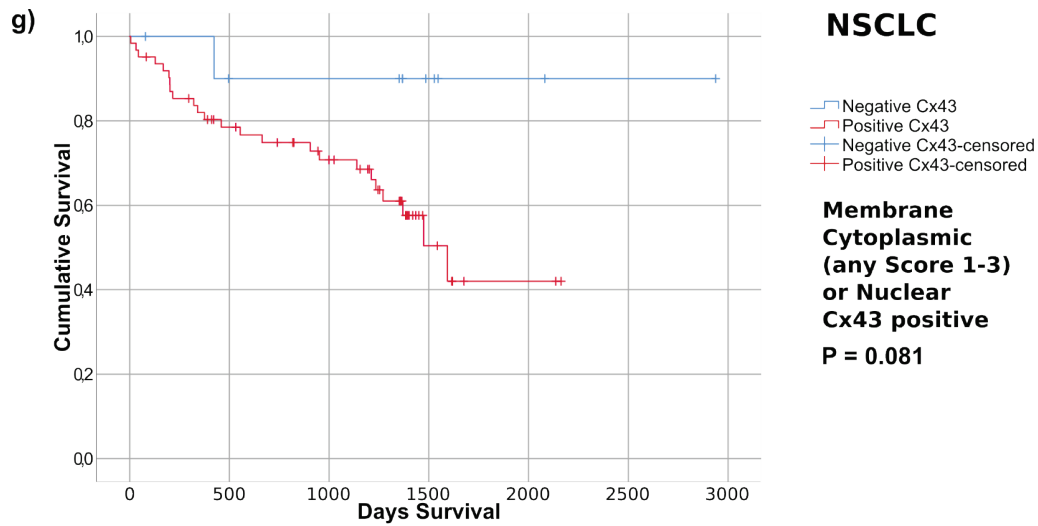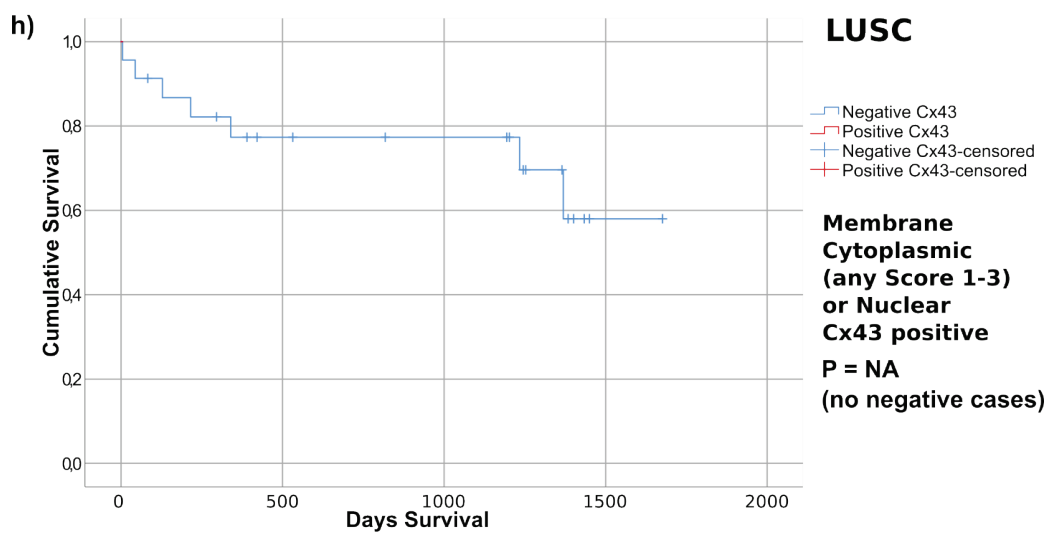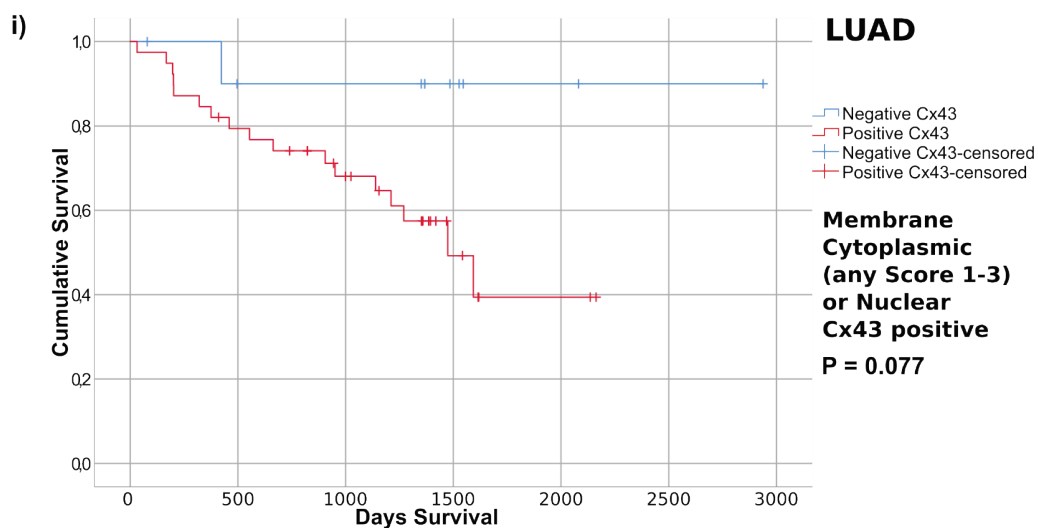

j)

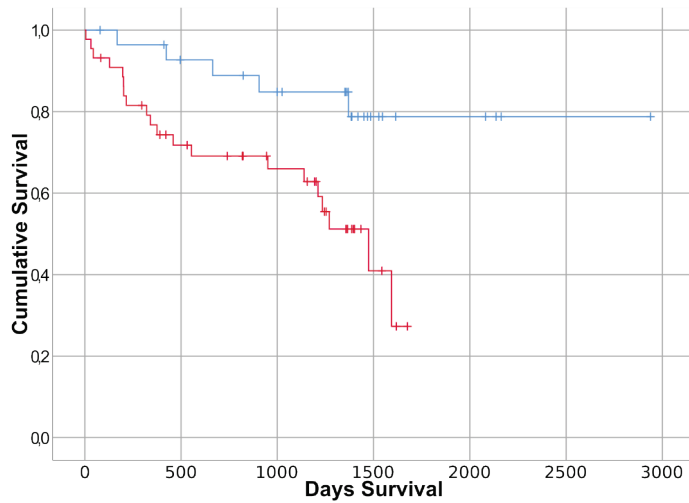

## NSCLC

— Negative Cx43  
— Positive Cx43  
+ Negative Cx43-censored  
+ Positive Cx43-censored

**Moderate Membrane  
or Cytoplasmic  
or any Nuclear  
Cx43 positive**

**P = 0.008**

k)

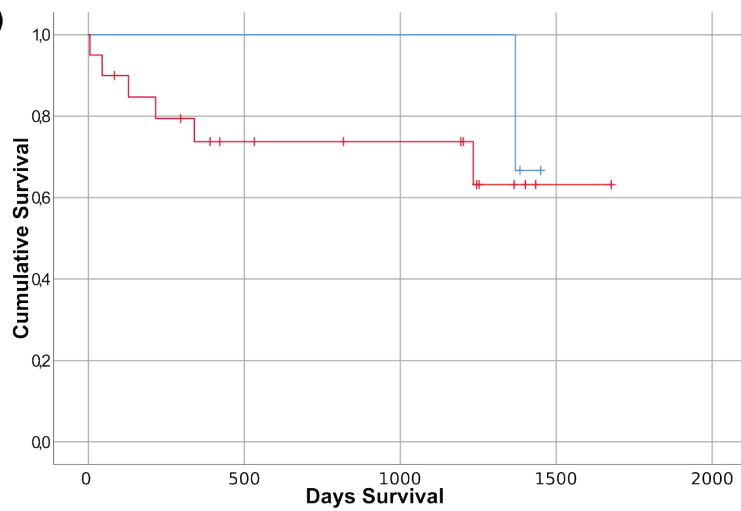

## LUSC

— Negative Cx43  
— Positive Cx43  
+ Negative Cx43-censored  
+ Positive Cx43-censored

**Moderate Membrane  
or Cytoplasmic  
or any Nuclear  
Cx43 positive**

**P = 0.599**

l)

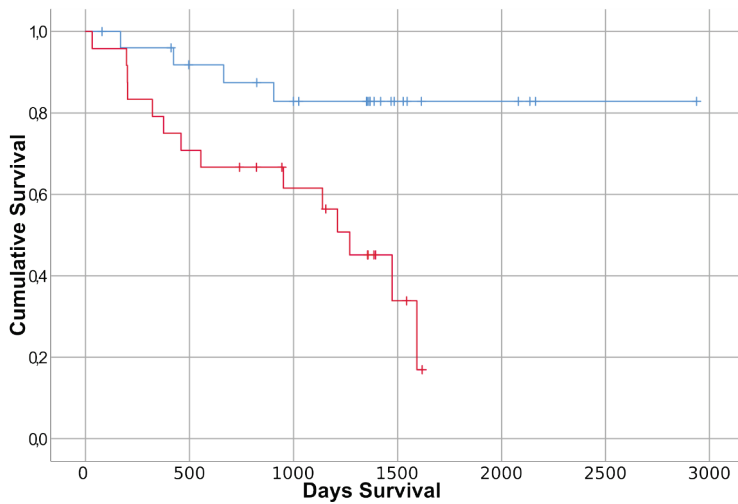

## LUAD

— Negative Cx43  
— Positive Cx43  
+ Negative Cx43-censored  
+ Positive Cx43-censored

**Moderate Membrane  
or Cytoplasmic  
or any Nuclear  
Cx43 positive**

**P = 0.005**
