# Supplementary material for: Insight into the Role and Regulation of Gap Junction Genes in Lung Cancer and Identification of Nuclear Cx43 as a Putative Biomarker of Poor Prognosis
Source: Preprints.org preprint supplement (doi:10.20944/preprints201902.0109.v1), 2019-02-13
Supplement: Supplementary file 5 [file supplementary]

**Supplementary Table 1.** Correlation between HR survival curves between Microarray based versus RNA-seq based analysis.

| Gene  | Connexin | HR Array<br>LUSC | HR RNA-<br>seq LUSC | Dis-<br>Cordance | HR Array<br>LUAD | HR RNA-<br>seq LUAD | Dis-<br>Cordance |
|-------|----------|------------------|---------------------|------------------|------------------|---------------------|------------------|
| GJA1  | Cx43     | 0,78             | 0.85                |                  | 0,64             | 1.34                | **               |
| GJA3  | Cx46     | 0,77             | 0.75                |                  | 1,48             | 1.2                 |                  |
| GJA4  | Cx37     | 0,83             | 1.43                | *                | 0,67             | 1.28                | **               |
| GJA5  | Cx40     | 1,20             | 1.58                |                  | 1,86             | 0.7                 | **               |
| GJA8  | Cx50     | 1,16             | 0.73                | *                | 0,60             | 0.8                 |                  |
| GJA10 | Cx62     | 0,77             | 0.73                |                  | 1,62             | 1.57                |                  |
| GJB1  | Cx32     | 1,38             | 1.38                |                  | 0,60             | 0.79                |                  |
| GJB3  | CX31     | 1,27             | 1.24                |                  | 2,39             | 1.94                |                  |
| GJB4  | Cx30.3   | 1,18             | 0.84                | *                | 1,88             | 1.59                |                  |
| GJB5  | Cx31.1   | 1,12             | 0.77                | *                | 1,63             | 1.49                |                  |
| GJB6  | Cx30     | 0,75             | 0.77                |                  | 0,82             | 1.35                | *                |
| GJB2  | Cx26     | 0,87             | 0.7                 |                  | 2,12             | 2.09                |                  |
| GJC1  | Cx45     | 1,22             | 0.78                | *                | 0,66             | 1.41                | **               |
| GJC2  | Cx47     | 0,81             | 1.34                | *                | 1,45             | 0.7                 | **               |
| GJC3  | Cx30.2   | 0,78             | 1.34                | *                | 1,76             | 1.43                |                  |
| GJD2  | Cx36     | 1,14             | 1.46                |                  | 2,13             | 0.82                | **               |
| GJD3  | Cx31.9   | 0,66             | 1.49                | ***              | 1,26             | 1.23                |                  |
| GJD4  | Cx40.1   | 0,83             | 0.86                |                  | 1,49             | 0.8                 | **               |

<sup>1</sup> Abbreviations: HR; hazard ratio, LUSC; squamous cell lung cancer, LUAD; Adeno Carcinoma lung cancer, <sup>2</sup> The table depicts the patient hazard ratio, where the cohort expressing high levels of connexin mRNA is either associated with better survival (depicted in green, HR less than 1, i.e., less chance of death) or with worse survival (red, HR greater than 1, i.e., higher chance of death). Those associations that have a significant statistical difference ( $p < 0.01$ ) are shown in bold. Correlation between HR survival curves between Microarray based versus RNA-seq based analysis. Samples in bold show significant statistical significance ( $P < 0.01$ ). One star suggest discordance in cohorts that don't reach statistical significance on their own; two stars suggests discordance where either the microarray or the RNA-seq cohort have reported statistical significance; and three stars denotes situations where both the microarray and RNA-seq analysis cohort reported the finding as significant.
